# Acarbose in obese patients with polycystic ovarian syndrome: a double-blind, randomized, placebo-controlled study

I.A.A.Penna<sup>1,2</sup>, P.R.B.Canella<sup>2</sup>, R.M.Reis<sup>1</sup>, M.F.Silva de Sá<sup>1</sup> and R.A.Ferriani<sup>1,3</sup>

<sup>1</sup>Department of Gynecology and Obstetrics, Faculty of Medicine of Ribeirão Preto, 14049-900 Ribeirão Preto, SP and <sup>2</sup>Institute of Gynecology, Federal University of Rio de Janeiro, Rio de Janeiro, RJ, Brazil

<sup>3</sup>To whom correspondence should be addressed at: Department of Gynecology and Obstetrics, Faculty of Medicine of Ribeirão Preto, 14049-900 Ribeirão Preto, SP, Brazil. E-mail: raferria@fmrp.usp.br

**BACKGROUND:** The present study assessed the effects of low-dose acarbose on obese patients with polycystic ovarian syndrome (PCOS). **METHODS:** A double-blind placebo-controlled study was conducted on 30 obese hyperinsulinaemic women with PCOS treated with 150 mg/day acarbose or placebo for 6 months. The women were evaluated for hirsutism, menstrual regularity, body mass index (BMI), insulin resistance and glucose tolerance, sex hormone-binding globulin (SHBG), LH, FSH, testosterone and androstenedione, and side-effects. **RESULTS:** The patients in the acarbose group showed a reduction in BMI ( $35.87 \pm 2.60$  versus  $33.10 \pm 2.94$  kg/m<sup>2</sup>) and in the Ferriman–Gallwey index ( $8.85 \pm 2.31$  versus  $8 \pm 1.82$ ), and an increased chance of menstrual regularity (rate = 2.67). SHBG concentration increased ( $21.01 \pm 7.9$  versus  $23.85 \pm 7.77$  nmol/l) and the free androgen index was reduced ( $14.81 \pm 9.06$  versus  $11.48 \pm 6.18$ ). None of these parameters were modified in the placebo group. Mild side-effects occurred in 84% of the patients in the acarbose group and disappeared after the first 3 months. **CONCLUSION:** A low dose of acarbose administered to obese patients with PCOS promotes a reduction in free androgen index and BMI and an increase in SHBG, with improvement of hirsutism and of the menstrual pattern, and is well tolerated by patients.

*Key words:* acarbose/hypoglycaemic drugs/hyperinsulinaemia/polycystic ovarian syndrome

## Introduction

Polycystic ovarian syndrome (PCOS) is characterized by menstrual irregularity, hyperandrogenism, chronic anovulation and enlarged ovaries with more than eight peripherally located, follicles < 10 mm (Franks, 1995). In ~25–60% of cases, patients with PCOS present glucose intolerance with consequent compensatory hyperinsulinaemia, and 30–40% of these cases are overweight or obese, with a body mass index (BMI) of > 25 kg/m<sup>2</sup> (Dunaif *et al.*, 1987). Insulin resistance may lead to hyperandrogenism by various mechanisms such as a central action (pituitary), a direct ovarian stimulus, or by a hepatic action with a reduced production of steroid hormone-binding globulin (SHBG) and insulin-like growth factor binding protein-1 (IGFBP-1) (Ehrmann *et al.*, 1992).

Drugs that improve insulin sensitivity have been used for the treatment of patients with PCOS, with metformin being the drug most extensively studied (Leo *et al.*, 2003; Lord *et al.*, 2003). Although effective, metformin has important side-effects which often limit its use. In this respect, studies have been conducted to determine the action of other agents that act on insulin sensitivity.

$\alpha$ -Glucosidase inhibitors such as acarbose act by reducing and slowing down the intestinal absorption of glucose, with

a reduction of the postprandial wave and a consequent reduction of insulin secretion (Laube, 2002). The use of these drugs by type II diabetic patients reduces the serum levels of glycosylated haemoglobin and increases insulin sensitivity (Lindström *et al.*, 2000). The most common side-effects of acarbose are abdominal distention, flatulence and meteorism, with the latter being dose dependent (Coniff *et al.*, 1996). The lowest dose of acarbose with a positive impact on glycaemia of diabetic patients was 150 mg/day (Rodier *et al.*, 1988; Santeusano *et al.*, 1993; Scheen, 1998).

Geisthovel *et al.* (1996) first studied the use of acarbose in non-diabetic patients. When they evaluated hyperandrogenic patients during the perimenopausal period they demonstrated that a dose of 300 mg/day reduced hyperandrogenism and improved insulin sensitivity in these patients. Ciotta *et al.* (2001) were the first to administer the same dose of acarbose for 3 months to hyperinsulinaemic non-obese patients with PCOS, obtaining a reduction of androgenic activity and regularity of the menstrual cycle. However, all treated patients presented gastrointestinal side-effects possibly due to the high dose used. Only one study compared the use of metformin to the use of acarbose in patients with PCOS and reported similar results (Hanjalic-Beck *et al.*, 2004).

Although the insulin resistance present in PCOS does not depend on body weight, obesity is known to worsen the situation (Reis *et al.*, 1995). The concentration of insulin receptors per adipocyte is reduced in obese patients (Kahn *et al.*, 1993) and ~44% of women with PCOS may be obese (Carmina and Lobo, 1999).

On the basis of these facts, the objective of the present study was to assess the endocrine, metabolic and clinical effects of acarbose in obese patients with PCOS. In view of possible side-effects that might limit the treatment with oral hypoglycaemic agents, a low-dose scheme was used.

## Materials and methods

A prospective randomized double-blind study was conducted on 30 obese patients with PCOS and insulin resistance, who were treated with 150 mg/day acarbose or placebo for 6 months. The patients were selected from June 2002 to May 2003 at the Gynecology Institute of the Federal University of Rio de Janeiro. All patients signed an informed consent form after receiving an explanation about the study and the project was approved by the Research Ethics Committee of the Gynecology Institute of the Federal University of Rio de Janeiro.

The inclusion criteria were: menstrual disorders (<6 menstruations/12 months), clinical (Ferriman–Gallwey index  $\geq 8$ ; Ferriman and Gallwey, 1961) or laboratory (testosterone  $> 80$  ng/dl and/or androstenedione  $> 190$  ng/dl) hyperandrogenism (Zawadzki and Dunaif, 1992), BMI (weight/height<sup>2</sup>) of 30–40 kg/m<sup>2</sup> (National Institute of Health, 2000), and insulin resistance (area under the insulin curve after the glucose tolerance test (GTT)  $> 6000$  mIU/ml; Reis *et al.*, 1995).

The exclusion criteria (threshold values) were: alterations of hepatic function aspartate aminotransferase (GOT), 31 IU/l and alanine aminotransferase (GTP), 36 IU/l, alterations of renal function (creatinine, 1.3 mg/dl and urea, 40 mg/dl), alterations of thyroid function [thyroid-stimulating hormone (TSH), 5.50 mIU/ml and free thyroxin, 1.76 ng/dl], presence of hyperprolactinaemia (20 ng/ml), presence of congenital adrenal hyperplasia [dehydroepiandrosterone sulphate (DHEA-S), 350 mg/dl and 17-hydroxyprogesterone (17-OHP), 180 ng/ml], presence of diabetes (fasting glycaemia of 126 mg/dl), and the use of hormonal medications or medications that might interfere with carbohydrate metabolism over the last 6 months.

## Treatment

The patients were assigned by computed randomization (GraphPad StatMate, San Diego, CA, USA) to two groups of 15 patients each respectively taking 50 mg acarbose or 50 mg placebo three times a day for 6 months. The medications were prepared and coded by the Industrial Pharmacy of the University Hospital of Ribeirão Preto using Glucobay (Bayer, Rio de Janeiro, RJ, Brazil) or flour and identified by codes (double-blind). The patients were submitted to clinical, metabolic and laboratory evaluation before and after 6 months of treatment.

## Clinical evaluation

The patients were submitted to clinical (number of menstrual cycles, Ferriman–Gallwey index) and anthropometric (weight, height, BMI) evaluation before and after treatment.

## Laboratory tests

Between the 2nd and 7th days of the menstrual cycle (or on any day in amenorrhoeic patients), the following basal measurements were

performed: LH, FSH, prolactin, testosterone, androstenedione, DHEA-S, 17 $\alpha$ -OHP, steroid hormone-binding globulin (SHBG), urinary cortisol, free thyroxin, TSH, urea, creatinine, GOT and GTP. A GTT was performed 3 days after a diet containing 300 mg carbohydrate, with ingestion of glucose (75 g Dextrosol; Vita, Rio de Janeiro, RJ, Brazil) and venipuncture at 0, 30, 60, 90 and 120 min and analysis of the areas under the insulin and glucose curves (Reis *et al.*, 1995). The insulinaemic index was calculated from the ratio between serum glucose concentration at 30 min and insulin concentration at the same time point (Wareham *et al.*, 1995). According to Kosaka *et al.* (1996), there is a strong correlation between insulinaemic index and insulin resistance.

The evaluation of diabetes mellitus was performed according to the norms of the Expert Committee on the Diagnosis of Diabetes Mellitus (1999): fasting glycaemia (8 h)  $\geq 126$  mg/dl or glycaemia  $\geq 200$  mg/dl after 120 min during the 75 g GTT.

All blood samples were obtained by venipuncture in the forearm using a number 21 butterfly catheter, centrifuged and stored at  $-20^{\circ}\text{C}$ . The hormone determinations were carried out at the University Hospital of the Faculty of Medicine of Ribeirão Preto, University of São Paulo. Glycaemia was determined by the enzymatic colorimetric glucose oxidase test (Merck-Biotrol, São Paulo, SP, Brazil). Insulinaemia was determined by radioimmunoassay (Coat-a-Count; DPC, Los Angeles, CA, USA) with intra- and inter-assay coefficients of variation (CV) of 5.1 and 7.2% respectively. FSH, LH, SHBG and prolactin were determined by chemoluminescence (Immulate 2000, DPC), with intra- and inter-assay coefficients of variation of 4.2 and 9.9% for LH, 5.1 and 12.5% for FSH, 5.3 and 6.6% for SHBG, and 3.6 and 7.4% for prolactin respectively. Testosterone, androstenedione and DHEA-S were determined by radioimmunoassay (Goldlab, São Paulo, SP, Brazil) and the intra- and inter-assay CV were 7.9 and 11.3% for testosterone, 8.5 and 12.3% for androstenedione, and 6.1 and 10.5% for DHEA-S. 17- $\alpha$ OHP was determined by radioimmunoassay (Treck, Santa Monica, CA, USA) with intra- and inter-assay CV of 5.3 and 5.9% respectively. TSH, free thyroxin and urinary cortisol were determined by chemiluminescence (ACS:180, Bayer, Rio de Janeiro, RJ, Brazil) with intra- and inter-assay CV of 3.98 and 5.26% for TSH, 3.44 and 3.96% for free thyroxin, and 4.5 and 6.4% for cortisol respectively. The free androgen index was calculated by the equation proposed by Siiteri and Simberg (1986) using the value of 0.03467 for the conversion of the measurement of total testosterone (Young, 1968).

## Statistical analysis

In view of the need to determine simultaneously the within- and between-group variations and considering the borderline size of the samples and the high variability of the data, Bayesian methodology using non-informative Prioris and the Winburg software, version 1.3 (MRC Biostatistic Unit, Cambridge, UK) were used for statistical analysis.

## Results

During the study, among the 30 patients selected, we excluded two patients from the acarbose group (one for abandonment of treatment and the other because of pregnancy) and one from the placebo group (abandonment), with no case of treatment intolerance. Four patients (28%) in the placebo groups and 11 (84%) in the acarbose group presented mild abdominal distention and flatulence, and all the patients in the acarbose group reported a reduction of side-effects after

the first 3 months. No patient showed laboratory changes regarding liver or renal function during treatment.

Before treatment, the groups studied did not show any difference regarding any of the clinical or laboratory parameters (Table I). Compared to pretreatment values, the acarbose group presented a reduction in BMI, an improved menstrual pattern (especially in the last 2 months of treatment), increased serum SHBG concentration, and increased free androgen index, while the placebo group did not show any difference between the pretreatment and post-treatment values for any parameter analysed (Table I and Figures 1 and 2). The probability of a patient in the acarbose group to menstruate in the last 2 months was 3.34-fold higher (95% CI 1.08–12.55) than in the second 2 months and 2.67-fold higher (95% CI 1.00–8.98) than in the placebo group in the last 2 months. About 85% of the patients in the acarbose group menstruated in the last 2 months versus 50% in the placebo group.

Regarding hirsutism, although the acarbose group did not present a significant reduction compared to pretreatment indices, statistical comparison adjusted for pretreatment values between the acarbose and placebo groups showed a significant reduction after treatment in the acarbose group ( $8.00 \pm 1.82$  versus  $10.36 \pm 3.84$  for placebo) (Figure 3). After treatment, there was a difference between the acarbose and placebo groups regarding BMI, free androgen index and Ferriman–Gallwey index.

## Discussion

Several studies have demonstrated the association between PCOS and insulin resistance (Burghen *et al.*, 1980; Taylor *et al.*, 1982; Barbieri *et al.*, 1983; Flier *et al.*, 1985; Dunaif *et al.*, 1987; Stuart *et al.*, 1987), with the estimate that, among the various causes of PCOS, insulin resistance may be present in 38% of cases (Legro *et al.*, 1999). Insulin resistance represents a condition whereby the ‘normal’ insulin concentration does not produce an adequate biological effect

(Kahn *et al.*, 1976). In this situation, pancreatic  $\beta$ -cells can elevate synthesis to compensate for resistance to the peripheral utilization of insulin. In addition, there is a reduction of hepatic clearance that culminates in hyperinsulinaemia (Barbieri and Hornstein, 1988). The lack of a biological effect of insulin in PCOS is a matter of debate, being attributed to molecular changes such as mutations of post-transduction errors of the insulin receptor (Dunaif *et al.*, 2001; Kido *et al.*, 2001).

Insulin regulates androgen metabolism not only by controlling their synthesis and secretion, but also indirectly by modulating the hepatic production of SHBG and IGFBP-1 (Leo *et al.*, 2003) and by increasing the activity of cytochrome P450 17 $\alpha$  in ovarian stroma and theca cells (Nestler and Jakubowicz, 1996). In obese patients with PCOS, in addition to all the mechanisms described, there is worsening of hyperandrogenism due to the synergism of obesity with insulin resistance, with a lower hepatic production of SHBG, an increase in the activity of cytochrome P450 17 $\alpha$  both in the ovary and in the adrenal gland, and a greater conversion of estrone by aromatase in peripheral adipose tissue, with a direct action on LH and an indirect action on thecal cells (Leo *et al.*, 2003). About 30–40% of patients with PCOS are obese (BMI  $\geq 30$  kg/m<sup>2</sup>) (Dunaif *et al.*, 1987) and in these patients the degree of insulin resistance is higher than in patients who are only obese (Rajkhowa *et al.*, 1994; Reis *et al.*, 1995).

Since the aetiopathogenesis of PCOS is linked to insulin resistance and may be complicated by obesity, it is plausible that medications which reduce glucose absorption with a consequent improvement of an exaggerated insulin response are ideal for treatment. Many drugs have been used for this purpose, the main ones being metformin, troglitazone, rosiglitazone, pioglitazone, D-chiro-inositol, and acarbose. Among them, metformin is the drug for which the greatest accumulation of beneficial evidence regarding the physiopathology of PCOS has been obtained (Lord *et al.*, 2003), with actions leading to increased ovulation rates and reduction of arterial

**Table I.** Clinical, endocrine and metabolic parameters of the patients with polycystic ovarian syndrome before and after treatment with acarbose for 6 months (mean  $\pm$  SD)

|                                                           | Placebo            |                                | Acarbose                      |                                |
|-----------------------------------------------------------|--------------------|--------------------------------|-------------------------------|--------------------------------|
|                                                           | Pre (n = 15)       | Post (n = 14)                  | Pre (n = 15)                  | Post (n = 13)                  |
| Age (years)                                               | 25.93 $\pm$ 1.83   |                                | 26.69 $\pm$ 1.46              |                                |
| Body mass index (kg/m <sup>2</sup> )                      | 35.04 $\pm$ 2.84   | 34.77 $\pm$ 3.33 <sup>a</sup>  | 35.87 $\pm$ 2.60 <sup>b</sup> | 33.10 $\pm$ 2.94 <sup>ab</sup> |
| Ferriman–Gallwey index                                    | 10.29 $\pm$ 4.70   | 10.36 $\pm$ 3.84 <sup>a</sup>  | 8.85 $\pm$ 2.31               | 8.00 $\pm$ 1.82 <sup>a</sup>   |
| LH (IU/l)                                                 | 5.46 $\pm$ 2.45    | 6.14 $\pm$ 3.00                | 5.40 $\pm$ 3.03               | 5.08 $\pm$ 2.83                |
| FSH (IU/l)                                                | 6.31 $\pm$ 1.92    | 6.05 $\pm$ 1.89                | 5.05 $\pm$ 1.70               | 5.22 $\pm$ 1.95                |
| Testosterone (ng/dl)                                      | 70.64 $\pm$ 29.70  | 73.85 $\pm$ 34.34              | 76.76 $\pm$ 21.16             | 69.46 $\pm$ 22.81              |
| Androstenedione (ng/dl)                                   | 133.95 $\pm$ 96.13 | 138.25 $\pm$ 45.79             | 139.72 $\pm$ 63.03            | 138.38 $\pm$ 56.95             |
| Free androgen index                                       | 13.99 $\pm$ 10.08  | 15.05 $\pm$ 12.20 <sup>a</sup> | 14.81 $\pm$ 9.06 <sup>b</sup> | 11.48 $\pm$ 6.18 <sup>ab</sup> |
| Sex hormone-binding globulin (nmol/l)                     | 21.79 $\pm$ 9.31   | 22.15 $\pm$ 9.71               | 21.01 $\pm$ 7.9 <sup>b</sup>  | 23.85 $\pm$ 7.77 <sup>b</sup>  |
| Area under the glucose curve after the GTT (mg/dl)        | 16057 $\pm$ 3472   | 15377 $\pm$ 3045               | 15173 $\pm$ 3804              | 15194 $\pm$ 3116               |
| Area under the insulin curve after the GTT ( $\mu$ IU/ml) | 16909 $\pm$ 8167   | 15692 $\pm$ 5252               | 17090 $\pm$ 6469              | 13845 $\pm$ 5976               |
| Insulin resistance index                                  | 0.95 $\pm$ 0.27    | 0.97 $\pm$ 0.36                | 1.12 $\pm$ 0.59               | 1.54 $\pm$ 0.45                |

Reference values for the determinations: LH = 1.1–11.6 IU/l; FSH = 2.8–11.3 IU/l; testosterone = 20–81 ng/dl; androstenedione = 0.4–2.7 ng/dl; SHBG = 18–114 nmol/l.

<sup>a</sup>Statistically significant difference between groups after treatment.

<sup>b</sup>Statistically significant difference within the acarbose group.

Analysis by the Bayesian method.

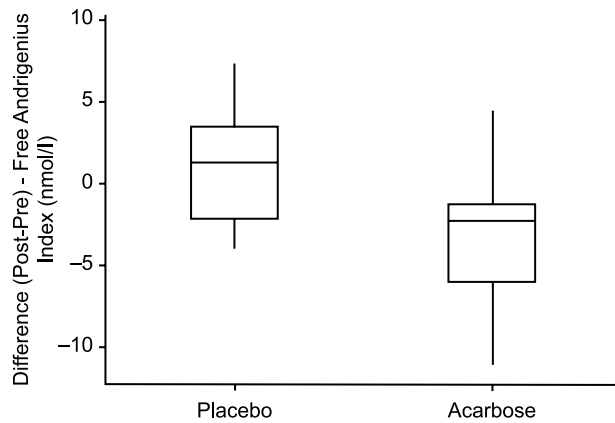

**Figure 1.** Box-plot of the difference in free androgen index before and after treatment of the women in the acarbose and placebo groups.

pressure, insulinaemia and low-density-lipoprotein cholesterol levels. However, the drug is not always well tolerated or may be inefficient (Lord *et al.*, 2003). Thus, new modalities of treatment are welcome.

Acarbose is a pseudo-tetrasaccharide produced from the culture of a natural microorganism called *Actinoplanes strain SE 50*. An unsaturated cyclitol with an important contribution to the inhibitory effect on  $\alpha$ -glucosidase exists in its molecule (Müller, 1985). In the small intestine, the drug forms a reversible and dose-dependent bond with the oligosaccharide site of  $\alpha$ -glucosidase. This reduces the hydrolysis of oligo- and disaccharides in the middle third of the duodenum, leading to reduction and later interruption of monosaccharide absorption and transport into the circulation. The drug has been used for the treatment of type II diabetes and has been found to be highly effective (Mertes, 2001).

Regarding carbohydrate metabolism, acarbose leads to a 20% reduction of the postprandial peak of glycaemia. This effect may last for as much as 5 h, with an increase in the time of glucose absorption that prevents glucidic toxicity and the consequent hyperinsulinaemia (Hanefeld *et al.*, 1991). The reduced glucose absorption leads to an indirect increase in glucagon 1-like peptide (GLP-1) which acts on the satiety centre of the brain, reducing appetite and facilitating weight reduction (Gutzwiller, 1997). Through the action of GLP-1, acarbose produces a reduction of appetite with a consequent reduction of BMI (Calle-Pascual *et al.*, 1996). Other studies have reported reduction of the final weight of patients with type II diabetes mellitus after the use of acarbose (Wolever *et al.*, 1998).

The lowest dose of acarbose with clinical effects is 150 mg/day, with doses  $> 300$  mg/day already exceeding the saturation of the  $\alpha$ -glucosidase receptor and causing no increase in the effect of the drug (Rodier *et al.*, 1988; Santeusano *et al.*, 1993). These are important aspects of treatment since side-effects such as flatulence, meteorism and abdominal distention are dose dependent. With a daily dose of 300 mg there is a 100% rate of side-effects, which is reduced to 47% within 2 months (Laube, 2002). In the present study there were fewer side-effects (84%) with a 100% reduction within 3 months.

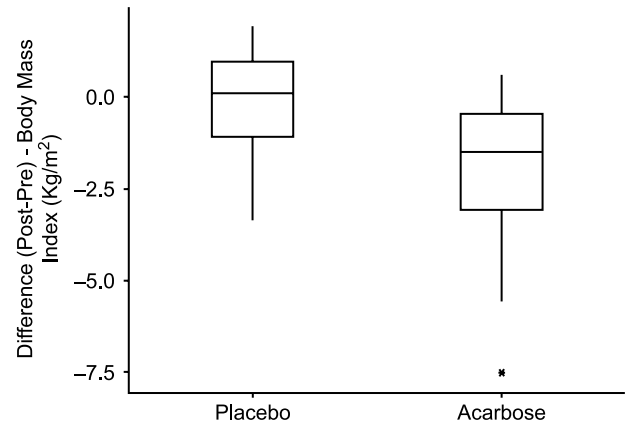

**Figure 2.** Box-plot of the difference in body mass index before and after treatment of the women in the acarbose and placebo groups.

Because of its mechanism of action, acarbose represents a good therapeutic option for patients with PCOS and insulin resistance. The first report of the use of this drug by non-diabetic patients was published by Geithovél *et al.* (1996), who detected a reduction of ovarian hyperandrogenism associated with attenuation of the postprandial glucose peak and with insulin sensitivity in hyperinsulinaemic and hyperandrogenic postmenopausal patients (Geithovél *et al.*, 1996). The first study that administered acarbose to patients with PCOS during menopause showed favourable effects on the Ferriman–Gallwey score and on acne/seborrhoea, with improvement in insulin sensitivity, increased SHBG, and reduced LH and hyperandrogenism (Ciotta *et al.*, 2001). However, with the posology studied in both investigations (300 mg/day) there was a 100% frequency of gastrointestinal side-effects. Recently, the use of acarbose (300 mg/day) was compared to the use of metformin (1.5 g/day) in patients with PCOS regardless of body weight and the results were similar both regarding clinical, endocrine and metabolic parameters and the cases of treatment discontinuation (Hanjalic-Beck *et al.*, 2004; Sönmez *et al.*, 2005).

Although a long list of benefits regarding clinical, metabolic and reproductive measures has been attributed to

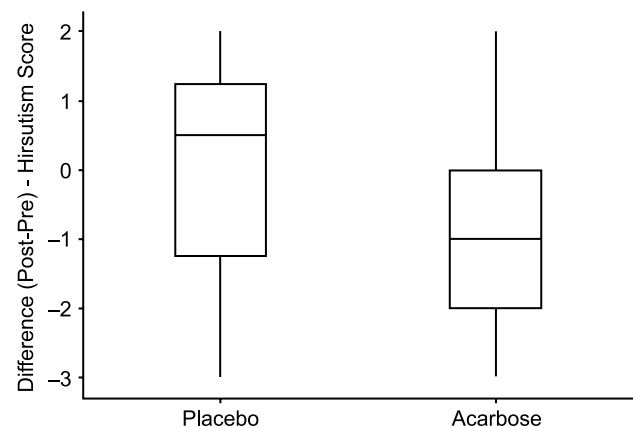

**Figure 3.** Box-plot of the difference in Ferriman–Gallwey index before and after treatment of the women in the acarbose and placebo groups.

metformin, a careful inspection of controlled studies shows that the results are modest (Harbone *et al.*, 2003), opening perspectives for the combination of drugs with different mechanisms. These data support the need for a better knowledge of new therapeutic options for patients with PCOS since the incidence of side-effects may be the limiting factor responsible for the decision about the treatment to be chosen. The present study points in this direction since it showed the clinical efficacy of acarbose used at the lowest biologically active dose (Rodier *et al.*, 1988; Santeusanio *et al.*, 1993). Without changing the insulinaemic response after glucide stimulation, acarbose was able to reduce the body weight and androgen activity of patients with PCOS, with less pronounced side-effects than obtained with standard posology. In contrast to the data reported by Ciotta *et al.* (2001), who detected a response of insulinaemia, our data indicate that the action of acarbose occurred mainly in terms of a reduction of body weight in obese patients. These differences can be explained by the weight of the patients, since all our patients were obese, in contrast to the normal weight of the patients of Ciotta *et al.* (2001).

The treatment of obese women with PCOS involves some additional difficulties due to the particularities of the synergism of physiopathological conditions, with higher rates of failure regarding the ovulatory response and the improvement of insulin resistance. Metformin induces a lower therapeutic response in obese patients with PCOS compared to obese patients without PCOS, especially regarding the level of improvement of insulin sensitivity (Maciel *et al.*, 2004; Metwally, 2004). In this respect, acarbose seems to be a good option for this subgroup of obese patients with PCOS since it has an effective action on body weight, with favourable clinical repercussions. However, acarbose had no effect on insulinaemic metabolism, although a comparative study showed no difference between acarbose and metformin (Hanjalic-Beck *et al.*, 2004). These observations open perspectives for studies using a combination of the two medications.

BMI was reduced only in the acarbose group, corroborating the results obtained by Calle-Pascual *et al.* (1996) and Wolever *et al.* (1998) who reported a reduction in BMI in type II diabetic and obese patients. The reduction in BMI was a determinant of the results of the present study and may explain in part the increase in SHBG, since there is an inverse relationship between obesity and serum SHBG concentration (Rajesh *et al.*, 1982; Hergenc *et al.*, 1999; Garault *et al.*, 2002; Lukanova *et al.*, 2004). The reduction in BMI favours the use of acarbose in obese patients, since metformin does not have the same action on body weight (Lord *et al.*, 2003). However, there are studies showing a decrease in weight or in abdominal adiposity (Morin-Papunen *et al.*, 2000; Pasquali *et al.*, 2000).

Regarding the menstrual pattern, the present study demonstrated that the patients taking acarbose tended to have regular menses, with a 2.67-fold higher chance of the occurrence of this event during the last 2 months of treatment compared to the placebo group. Ciotta *et al.* (2001) also reported regularity of menstrual cycles in 60% of the patients in the acarbose group but in their study they did not assess

the chance of occurrence of this event, an important feature that provides the real dimension of the action of the drug on menstruation. This tendency to regular menstruations seems to be related to weight reduction, which favours increased SHBG production, reduction of the fraction of free androgens, a lower peripheral estrone conversion, and a lower action on ovarian androgens. Regarding hirsutism, a treatment of 6 months is rather short to investigate the effect on this characteristic, and the placebo group was already more hirsute (not significantly) before treatment, so the difference was not necessarily due to the effect of acarbose.

No improvement in insulin resistance or in the area under the insulin curve was observed, in contrast to the data reported by Chiasson *et al.* (1996), Geisthovel *et al.* (1996) and Ciotta *et al.* (2001), who obtained the inverse result with double the dose used in the present study. Rodier *et al.* (1988) and Santeusanio *et al.* (1993) reported a reduction in glycosylated haemoglobin levels with the use of 150 mg/day acarbose and Rachamani *et al.* (2004) reported a reduction in insulin resistance with the low dose. However, the present study was the only one conducted exclusively on obese patients and the results agree with those reported on the effects of metformin on very obese women, suggesting a synergism of physiopathological conditions (obesity and insulin resistance) (Maciel *et al.*, 2004).

The present study, a pioneering investigation of the effects of acarbose on obese patients with PCOS, suggests that this drug could be used in a safe manner by patients with PCOS and hyperinsulinaemia and that low and well-tolerated doses of the drug have an action on body weight and hyperandrogenism in these patients. The study opens perspectives for future investigation combining drugs with different mechanisms of action in patients with PCOS, especially obese ones for whom standard treatments are less effective.

## References

- Barbieri RL and Hornstein MD (1988) Hyperinsulinemia and ovarian hyperandrogenism: cause and effect. *Endocrinol Metab Clin North Am* 17, 685–703.
- Barbieri RL, Makris A and Ryan KJ (1983) Effects of insulin on steroidogenesis in cultured porcine ovarian theca. *Fertil Steril* 40,237–241.
- Burghen GA, Givens JR and Kitabchi AE (1980) Correlation of hyperandrogenism with hyperinsulinism in polycystic ovary disease. *J Clin Endocrinol Metab* 50,113–111.
- Calle-Pascual A, Garcia-Honduvilla J and Martin-Alvarez PJ (1996) Influence of 16-week monotherapy with acarbose on cardiovascular risk factors in obese subjects with non-insulin-dependent diabetes mellitus: a controlled, double-blind comparison study with placebo. *Diabet Metab* 22,201–202.
- Carmina E and Lobo RA (1999) Polycystic ovary syndrome (PCOS): arguably the most common endocrinopathy is associated with significant morbidity in women. *J Clin Endocrinol Metab* 84,1897–1899.
- Chiasson JL, Josse RG, Leiter LA, Mihic M, Nathan DM, Palmason C, Cohen RM and Wolever TM (1996) The effect of acarbose on insulin sensitivity in subjects with impaired glucose tolerance. *Diabet Care* 19, 1190–1193.
- Ciotta L, Calogero AE, Farina M, De Leo V, La Marca A and Cianci A (2001) Clinical, endocrine and metabolic effects of acarbose, an  $\alpha$ -glucosidase inhibitor, in PCOS patients with increased insulin response and normal glucose tolerance. *Hum Reprod* 16,2066–2072.
- Coniff RF, Seaton TB, Shapiro JA, Robbins D, Kleinfield R, MacGill JB and Beisswenjer D (1996) Reduction of glycosylated hemoglobin and postprandial hyperglycemia by acarbose in patients with NIDDM. *Diabet Care* 18,817–820.

- Dunaif A, Graf M, Mendeli J, Laumas V and Dobrjansky A (1987) Characterization of groups of hyperandrogenic women with acanthosis nigricans, impaired glucose tolerance, and/or hyperinsulinemia. *J Clin Endocrinol Metab* 65,499–507.
- Dunaif A, Wu X and Lee A (2001) Defects in insulin receptor signaling in vivo in the polycystic ovary syndrome. *Am J Physiol Endocrinol Metab* 281,392–399.
- Ehrmann DA, Rosenfield RL, Barnes RB, Brigell DF and Sheirh Z (1992) Detection of functional ovarian hyperandrogenism in women with androgen excess. *New Engl J Med* 327,157–162.
- Ferriman D and Gallwey JD (1961) Clinical assessment of body hair growth in women. *J Clin Endocrinol Metab* 21,1440–1447.
- Flier JS, Eastman RC, Minaker KJ, Matteson D and Rowe JW (1985) Acanthosis nigricans in obese women with hyperandrogenism: characterization of an insulin-resistant state distinct from type A and B syndrome. *Diabetes* 34,101–107.
- Franks S (1995) Polycystic ovary syndrome. *New Engl J Med* 333,853–861.
- Garaulet M, Perez-Llamas F, Zamora S and Tebar FJ (2002) Interrelationship between serum lipid profile, serum hormones and other components of the metabolic syndrome. *J Physiol Biochem* 58,151–160.
- Geisthovel F, Frorath B and Brabant G (1996) Acarbose reduces elevated testosterone serum concentration in hyperinsulinaemic premenopausal women: a pilot study. *Hum Reprod* 11,2377–2381.
- Gutzwiller JP (1997) Glucagon like peptide-1 is a physiologic regulator of food intake in humans. *Gastroenterology* 112,a1153.
- Hanjalic-Beck A, Schories M, Reincke M, Kissel C and Karck U (2004) Metformin versus acarbose therapy in patients with polycystic ovary syndrome (PCOS): a prospective randomized double-blind study. *Hum Reprod* 19 (Suppl 1),44.
- Harbone L, Fleming R, Lyall H and Sattar N (2003) Descriptive review of the evidence for the use of metformin in polycystic ovary syndrome. *Lancet* 361,1894–1901.
- Hanefeld M, Fischer S and Schulze J (1991) Therapeutic potentials of acarbose as first-line drug in NIDDM insufficiently treated with diet alone. *Diabet Care* 14,732–737.
- Hergenc G, Schulte H, Assmann G and Von Eckardstein A (1999) Associations of obesity markers, insulin, and sex hormones with HDL-cholesterol levels in Turkish and German individuals. *Atherosclerosis* 145,147–156.
- Kahn CR, Flier JS, Bar RS, Archer JA, Gorden P and Martin MM (1976) The syndromes of insulin resistance and acanthosis nigricans. *New Engl J Med* 294,739–745.
- Kahn CR, Prigeon RL and McCulloch DK (1993) Qualification of the relationship between insulin sensitivity and  $\beta$ -cell function in human subjects. Evidence for a hyperbolic function. *Diabetes* 42,1663–1672.
- Kido Y, Nakae J and Accili D (2001) The insulin receptor and its cellular targets. *J Clin Endocrinol Metab* 86,972–979.
- Kosaka K, Kuzuya T, Hagura R and Yoshimaga H (1996) Insulin response to oral glucose load is consistently decreased in established non-insulin-dependent diabetes mellitus: the usefulness of decreased early insulin response as a predictor of non-insulin-dependent diabetes mellitus. *Diabet Med* 13,109–119.
- Laube H (2002) Acarbose. *Clin Drug Invest* 22,141–156.
- Legro RS, Kuselman AR and Dunaif A (1999) Prevalence and predictors of risk for type 2 diabetes mellitus and impaired glucose tolerance in polycystic ovary syndrome: a prospective, controlled study in 254 affected women. *J Clin Endocrinol Metab* 84,165–169.
- Leo V, Marca A and Petraglia F (2003) Insulin-lowering agents in the management of polycystic ovary syndrome. *Endocr Rev* 24,633–667.
- Lindström J, Tuomilehto J and Spengler M (2000) Acarbose treatment does not change the habitual diet of patients with type 2 diabetes mellitus. *Diabet Med* 17,1612–1618.
- Lord JM, Flight IHK and Norman RJ (2003) Metformin in polycystic ovary syndrome: systematic review and meta-analysis. *Br Med J* 327,1–6.
- Lukanova A, Lundin E, Zeleniuch-Jacquotte A and Muti P (2004) Body mass index, circulating levels of sex-steroid hormones, IGF-I and IGF-binding protein-3: a cross-sectional study in healthy women. *Eur J Endocrinol* 150,161–171.
- Maciel GAR, Junior JMS, Motta ELA, Abi Haidas M, de Lima GR and Baracat EC (2004) Nonobese women with polycystic ovary syndrome respond better than obese women to treatment with metformin. *Fertil Steril* 81,355–360.
- Mertes G (2001) Safety and efficacy of acarbose in the treatment of type II diabetes. Data from a 5-year surveillance study. *Diabet Res Clin Pract* 52,193–204.
- Metwally MS (2004) The use of metformin in women with polycystic ovary syndrome: how effective is it? *Hum Reprod* 19 (Suppl 1),45.
- Morin-Papunen LC, Vauhkonen I, Koivunen RM, Ruokonen A, Martikainen HK and Tapanainen JS (2000) Endocrine and metabolic effects of metformin versus ethinyl estradiol-cyproterone acetate in obese women with polycystic ovary syndrome: a randomized study. *J Clin Endocrinol Metab* 85,3161–3168.
- Müller L (1985) Microbial glycosidase inhibitor. *Biotechnology* 18,2–37.
- National Institute of Health (2000) The Practical Guide: Identification, Evaluation and Treatment of Overweight and Obesity in Adults. In National Heart, Lung and Blood Institute North American Association for Study of Obesity. National Institute of Health, Bethesda, MD, pp. 1–24.
- Nestler JE and Jakubowicz DJ (1996) Decreases in ovarian cytochrome p450c17 activity and serum free testosterone after reduction of insulin secretion in polycystic ovary syndrome. *New Engl J Med* 335,617–623.
- Pasquali R, Gambineri A, Biscotti D, Vicennati V, Gagliardi L, Colitta D, Fiorini S, Cognigni GE, Filicori M and Morselli-Labate AM (2000) Effect of long-term treatment with metformin added to hypocaloric diet on body composition, fat distribution, and androgen and insulin levels in abdominally obese women with and without the polycystic ovary syndrome. *J Clin Endocrinol Metab* 85,2767–2774.
- Rachamani R, Bar-Dayan Y and Ronen Z (2004) The effect of acarbose on insulin resistance in obese, hypertensive subjects with normal glucose tolerance: randomized controlled study. *Diabet Obes Metab* 6,63–68.
- Rajesh S, Moody LO and Landgrebe SC (1982) Sex-hormone-binding globulin in clinically hyperandrogenic women: association of plasma concentration with body weight. *Fertil Steril* 2,207–211.
- Rajkhowa M, Bicknel J, Jones M and Clayton RN (1994) Insulin sensitivity in women with polycystic ovary syndrome: relationship to hyperandrogenemia. *Fertil Steril* 61,605–612.
- Reis RM, Foss MC, Dias de Moura M and Ferriani RA (1995) Insulin secretion in obese and non-obese women with polycystic ovary syndrome and relationship with hyperandrogenism. *Gynecol Endocrinol* 9,45–50.
- Rodier M, Richard JL, Monnier L and Miraube J (1988) Effect of long term acarbose (Bay g 5421) therapy on metabolic control on non-insulin-dependent (type II) diabetes mellitus. *Diabet Met* 14,12–14.
- Santeusano F, Ventura MM and Contadinbi S (1993) Efficacy and safety of two different dosages of acarbose in non-insulin dependent diabetic patients treated by diet alone. *Diabet Nutr Metab* 6,147–154.
- Scheen AJ (1998) Clinical efficacy of acarbose in diabetes mellitus: critical review of controlled trials. *Diabet Metab* 24,311–320.
- Siiteri PK and Simberg NH (1986) Changing concepts of active androgens in blood. *Clin Endocrinol Metab* 15,247–258.
- Sönmez AS, Yaar L, Savan K, Koç S, Özcan J, Toklar A, Yazcolu F, Akgün A and Sut N (2005) Comparison of the effects of acarbose and metformin use on ovulation rates in clomiphene citrate-resistant polycystic ovary syndrome. *Hum Reprod* 20,175–179.
- Stuart CA, Prince MJ, Peters EJ and Meyer WJ III (1987) Hyperinsulinemia and hyperandrogenemia: in vivo androgen response to insulin infusion. *Obstet Gynecol* 69,921–925.
- Taylor SI, Dons RF, Hernandez E, Roth J and Gorden P (1982) Insulin resistance associated with androgen excess in women with auto-antibodies to the insulin receptor. *Am Intern Med* 97,851–855.
- Wareham NJ, Phillips DL and Byrne CD (1995) The 30 minute insulin incremental response in an oral glucose tolerance test as a measure of insulin secretion (letter; comment). *Diabet Med* 12,931.
- Wolever TMS, Chiasson JL, Josse RG, Hunt JA, Palmason C, Rodger NW, Ross SA, Ryan EA and Tan MH (1998) No relationship between carbohydrate intake and effect of acarbose on HbA1c or gastrointestinal symptoms in type 2 diabetic subjects consuming 30–60% of energy from carbohydrate. *Diabet Care* 21,1612–1618.
- Young DS (1968) Implementation of SI units for clinical laboratory data. *Ann Intern Med* 106,114–129.
- Zawadzki JK and Dunaif A (1992) Diagnostic criteria of polycystic ovary syndrome: towards a rational approach. In Dunaif A, Givens JR, Haseltine FP, and Merriam R (eds) *Polycystic Ovary Syndrome*. Blackwell Scientific, Boston, pp. 377–384.

Submitted on February 15, 2005; resubmitted on April 24, 2005; accepted on April 27, 2005
